# Supplementary material
Source: PubMed Central journal article supplement (PMC6885007)
Supplement: NIHMS1058036-supplement-supplement.pdf [file NIHMS1058036-supplement-supplement.pdf]

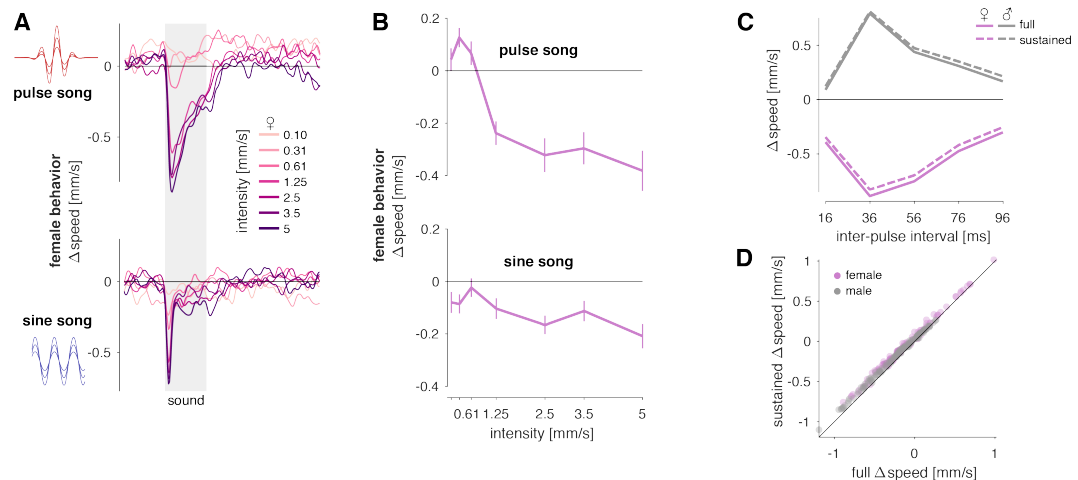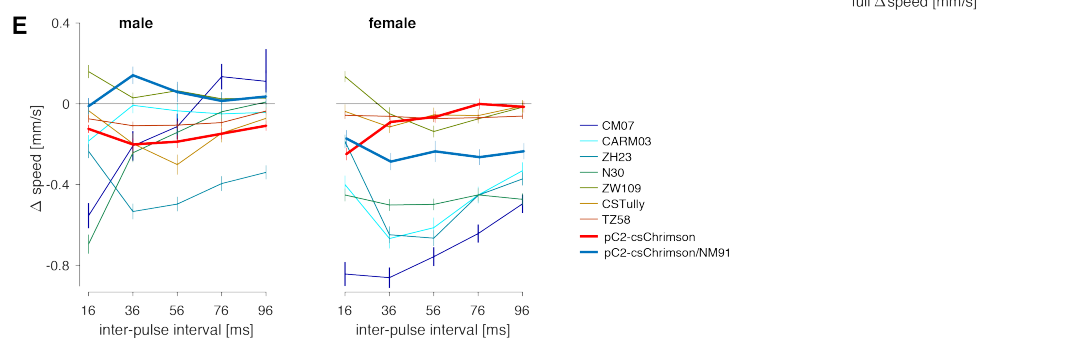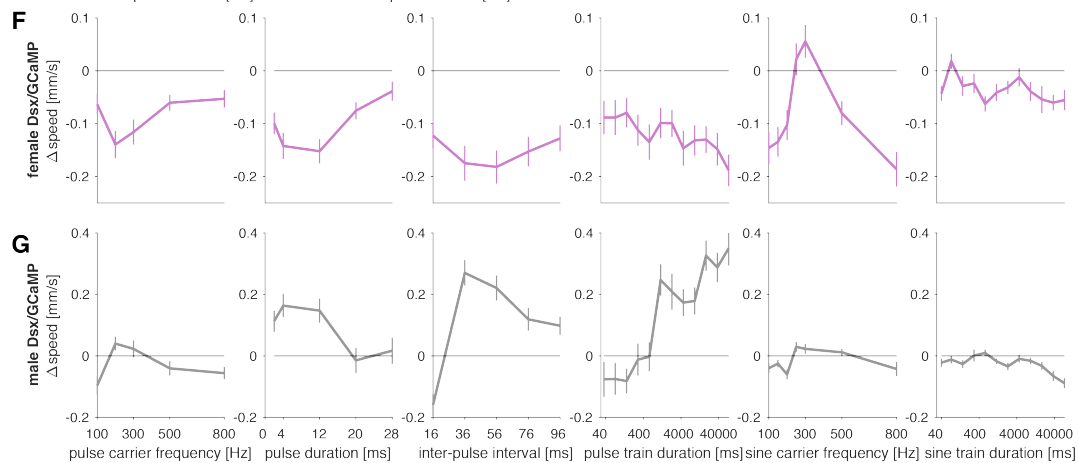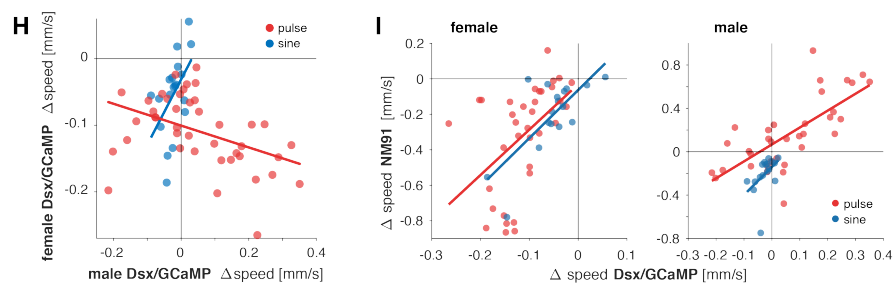

**Figure S1. Behavioral responses to song features and comparisons between *Drosophila melanogaster* strains. Related to Figures 1 and 2.**

**A** Female locomotor responses for pulse trains (36ms IPI stimulus) and sine tones (100Hz tones) of different intensities (color coded, see legend). Intensity is given in mm/s since flies are sensitive to the particle velocity of sound, not sound pressure.

**B** Speed tuning curves for the traces in A obtained by averaging the speed in the six seconds following stimulus onset. For pulse song, responses are weak for intensities <1mm/s and don't change much beyond that. While sine responses are weak, there is a tendency for speed to change more for louder sine tones. Lines and error bars indicate mean $\pm$ SEM over ~120 flies.

**C** Excluding the transient response component only negligibly affects behavioral tuning curves. Shown are IPI tuning curves for males (gray) and females (magenta) obtained by averaging different epochs of the speed traces. The full response (solid lines) corresponds to the average, base-line subtracted speed in the 6 seconds following sound onset. For the sustained response (dashed lines), we start integration of the speed traces not at sound onset but 500ms into the sound. Tuning curves for the full and sustained phases are very similar – the negative transient response component adds only a weak negative bias to the tuning curves.

**D** Full vs. sustained responses for all stimuli tested in males (gray) and females (magenta). Both measures yield highly correlated responses (Spearman rank correlation  $r=1.0$ ,  $p=0$ ). The purely negative transient response component in the full responses adds a negligible negative bias.

**E** IPI tuning in seven additional strains is diverse and not consistent with the species-typical tuning (male left, female right, see legend for strains used). Note, however, that most strains still respond sex-specifically to pulse song, similar to NM91 and Dsx/GCaMP. These strains produce similar responses to song in a natural courtship assay, suggesting that these strains require sensory cues that are missing in FLYTRAP for expressing their tuning or song. pC2-csChrimson and pC2-csChrimson/NM91 are the two strains used for optogenetic activation of pC2 in FLYTRAP (see Figures 5G-L).

**F, G** Locomotor tuning curves for females (F, magenta) and males (G, grey) of the Dsx/GCaMP (solid lines) and of the NM91 strain (dashed lines) for 6 different features of pulse and sine song. Lines and error bars correspond to the mean $\pm$ SEM across flies (see Table S1 for a description of all stimuli and number of flies). Data for the wild type strain NM91 same as in Figures 2A-B). Each strain is plotted with a different y-scale, to facilitate comparison of the tuning curves.

**H** Average change in speed for Dsx/GCaMP males and females for each pulse (red) and sine (blue) stimulus tested (data from F, G and not shown). Responses to sine stimuli are positively correlated between sexes ( $r=0.48$ ,  $p=3\times 10^{-3}$ ). Pulse responses are negatively correlated ( $r=-0.58$ ,  $p=0.01$ ) (compare Figure 2D).

**I** Comparison between average changes in speed in NM91 wild flies versus Dsx/GCaMP flies for males (left) and females (right). Responses for both sine (blue) and pulse (red) are similar between both strains in both sexes (females: pulse  $r=0.50$ ,  $p=0.04$ , sine  $r=0.59$ ,  $p=3\times 10^{-4}$ ; males: pulse  $r=0.68$ ,  $p=4\times 10^{-3}$ , sine  $r=0.75$ ,  $p=9\times 10^{-7}$ ).

Graphs in B, E-G show mean  $\pm$  SEM over individuals (90-150 flies per strain and sex). All correlation values are Spearman's rank correlation. Blue and red lines in H and I correspond to linear fits to the responses to sine and pulse song, respectively. All data in A-D from wild type flies of the NM91 strain. Strains in E-I indicated in legend or axis labels.

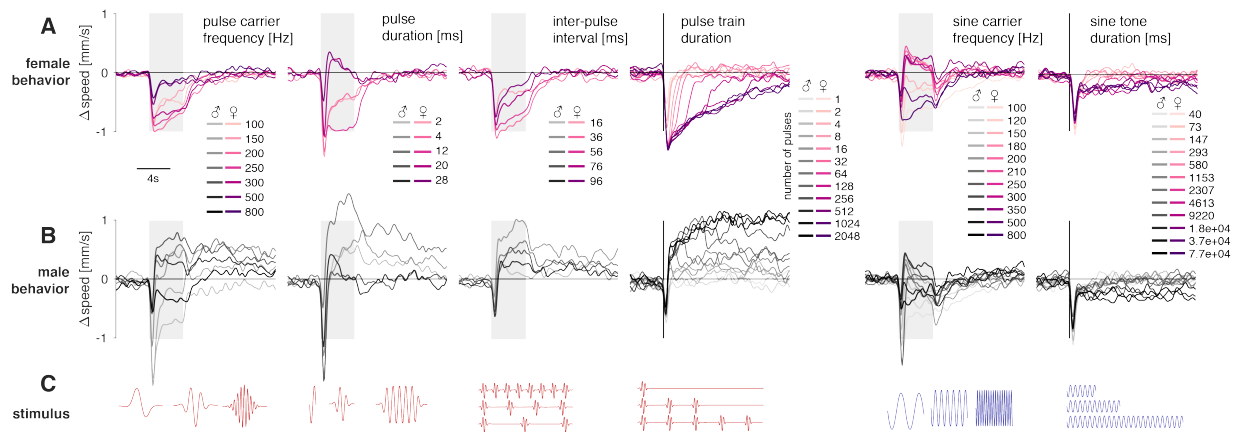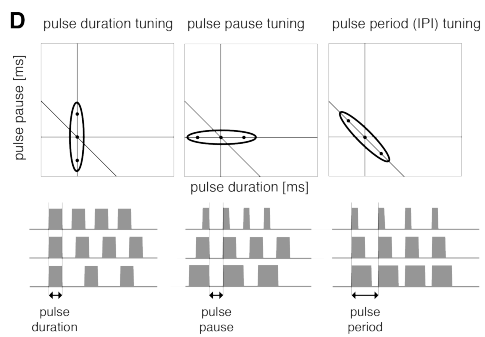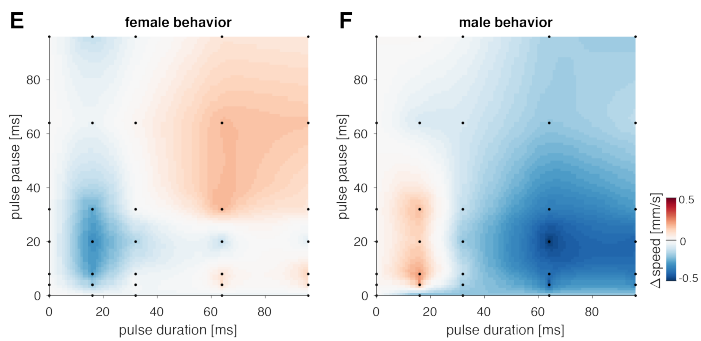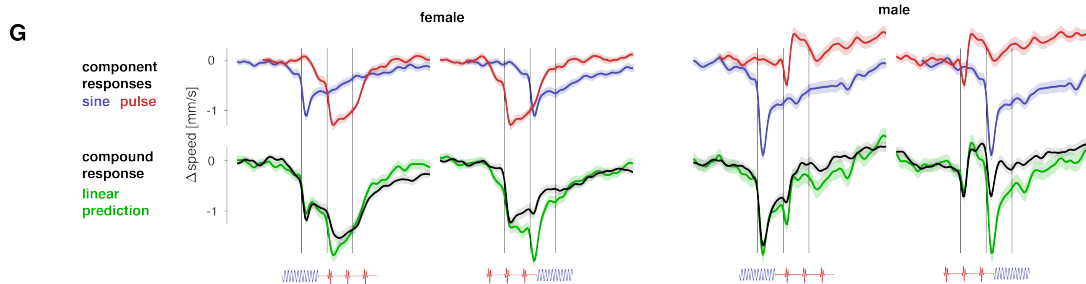

**Figure S2. Locomotor responses in FLYTRAP are tuned for multiple song features. Related to Figures 2 and 3.**

**A, B** Locomotor response traces for all stimuli in Figures 2A-B for females (A) and males (B). Stimulus values are color coded (see legends). Gray shaded areas mark the duration of the sound stimulus. Vertical black lines indicate sound onset for stimulus sets with varying durations (pulse train duration, sine tone duration). Lines correspond to the mean over typically ~120 animals. Error bars are similar to those in 1C and omitted for clarity.

**C** Pictograms (not to scale) illustrating each song feature examined in A-B. Pulse and sine song features are marked red and blue, respectively.

**D** Three principal types of tuning are observable when testing behavioral responses for stimuli with different pulse durations and pauses. Black ellipses indicate the range of stimulus parameters that evoke strong behavioral responses, dots correspond to the three (gray) stimuli shown below each tuning field. Horizontal, vertical, and anti-diagonal lines mark stimuli with constant pause, duration and period, respectively. Pulse duration tuning (left) corresponds to high selectivity (narrow tuning) for pulse duration and higher tolerance for pulse pauses. Pause duration tuning (middle), corresponds to high selectivity for pulse pause and high tolerance for pulse duration. Note that for both types, the tuning for pulse duration and pulse pause does not interact – e.g. the preferred pause does not change with pulse duration. Pulse period (a.k.a. inter-pulse interval) tuning (right) corresponds to a preference for stimuli with a constant pulse period, given by the sum of pulse duration and pause. For this type of tuning, pulse duration and pulse pause interact – the preferred pulse pause increases with decreasing pulse duration.

**E, F** Locomotor responses of females (E) and males (F) for pulse trains with different pulse durations and pulse pauses. Speed values are color coded (see color bar in F). Black dots mark the parameter combinations of the stimuli tested in FLYTRAP. Intermediate values were obtained using interpolation (see methods). Male and female response fields are similar except for the sign – were females tend to slow (blue colors), males tend to accelerate (red colors), and vice versa (compare Figure 2E). Responses are more selective for pulse duration than for pulse pause and pulse duration tuning is relatively independent of the pulse duration.

**G** Responses to sequences of sine tones (blue) and pulse trains (red). First and third row correspond to 2s sine followed by 2s pulse for females and males, respectively. For the second and fourth the order is reversed – stimuli start with 2s pulse song and transition into 2s sine song. The top row shows responses to the individual components of the sequence aligned to the onset of the component in the combined stimulus. The bottom row shows responses for both sexes to the compound stimuli (black) and the linear prediction obtained by summing the responses to the individual components (green). The linear prediction matches the measured responses well except at the transition due to transient response to sound onset only present in individual component responses. Lines and shaded areas correspond to the mean  $\pm$  SEM over 189 female and 217 male flies.

All behavioral data from wild type flies of the NM91 strain.

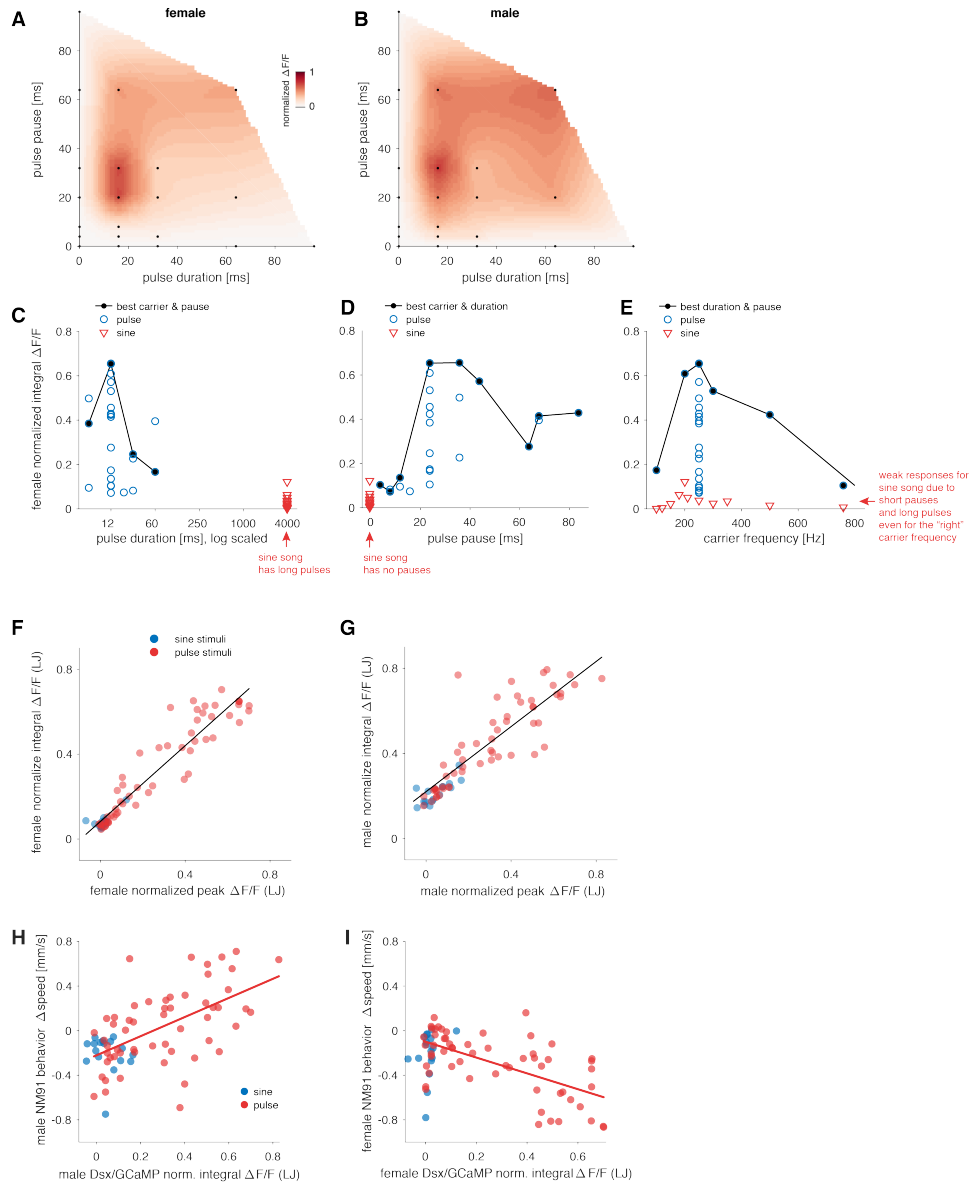

**Figure S3. Calcium responses in the LJ are tuned for multiple song features. Related to Figure 3.**

**A, B** Calcium responses from the female (A) or male (B) LJ for pulse trains with different combinations of pulse pauses and pulse durations. The stimuli constitute a subset of those measured in the behavior. LJ tuning for pulse trains with different pulse pauses and pulse durations recapitulates the behavioral tuning (compare Figures S2E-F): LJ responses are more selective for pulse duration than for pulse pause and the preferred pulse duration does not change with pause duration.

**C** Calcium response of the female LJ as a function of the pulse duration for all stimuli in our data set with a duration of 4 seconds. Blue circles correspond to pulse stimuli and red triangles mark sine stimuli, which by definition do not have pauses and can be thought of as very long pulses. Note that besides pulse duration, all stimuli also differ in pulse pause and carrier frequency – for instance all sine stimuli (red triangles) differ in carrier frequency. Stimuli with the same pulse duration evoke diverse calcium responses (integral  $\Delta F/F$ ) since they differ in these other stimulus features. The black line connects stimuli that have the optimal pulse carrier frequency (250 Hz) and pulse pause (20 ms). To account for differences in  $\Delta F/F$  across individuals, values were normalized by the maximal  $\Delta F/F$  for each individual.

**D** Same calcium response data as in C but now plotted as a function of pulse pause. Sine stimuli correspond to pulse trains with no pauses – they are by definition continuous oscillations. The black line connects stimuli with the optimal pulse duration (12ms) and pulse carrier frequency (250 Hz).

**E** Same calcium response data as in C but now plotted as a function of pulse carrier frequency. Sine stimuli differed in their carrier frequencies. The black line connects stimuli with the optimal pulse duration (12ms) and pulse pause duration (24 ms).

**F, G** Comparison of peak and integral  $\Delta F/F$  values from the LJ for all stimuli tested in females (F) and males (G). Pulse and sine song are marked with red and blue, respectively. The black lines correspond to the best linear fit. Each dot represents the average response to a pulse or a sine stimulus. Both measures of calcium responses are highly correlated (males:  $r=0.93$ ,  $p=1 \times 10^{-31}$ , female:  $r=0.94$ ,  $p=7 \times 10^{-35}$ ).

**H, I** Comparison of behavioral and neuronal tuning (LJ) in males (H) and females (I). Neuronal responses are from Dsx/GCaMP flies and behavioral data come from wild type flies (NM91). Dots correspond to the average normalized integral  $\Delta F/F$  and average  $\Delta$ speed for each stimulus, and lines indicate linear fits. The pattern of correlations is similar to using behavioral data from Dsx/GCaMP flies (compare Figures 3H-I; males: pulse (red)  $r=0.58$ ,  $p=7 \times 10^{-3}$ ; sine (blue)  $r=-0.90$ ,  $p=5 \times 10^{-3}$ ; females: pulse (red)  $r=-0.66$ ,  $p=6 \times 10^{-7}$ ; sine (blue)  $r=0.11$ ,  $p=0.55$ ).

All  $\Delta F/F$  values from flies expressing GCaMP6m in all Dsx+ cells. All correlation values are Spearman's rank correlation.

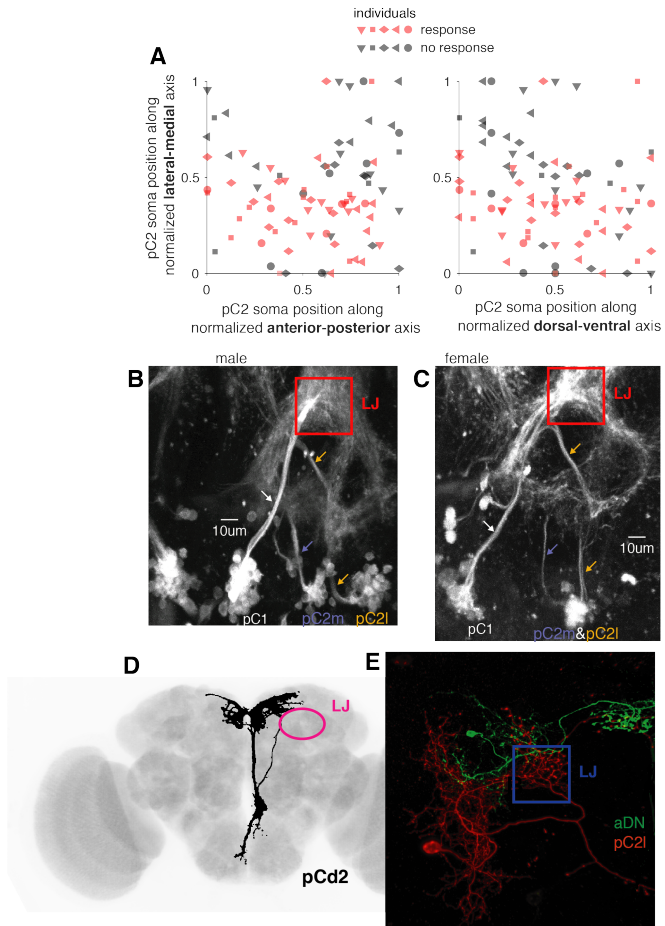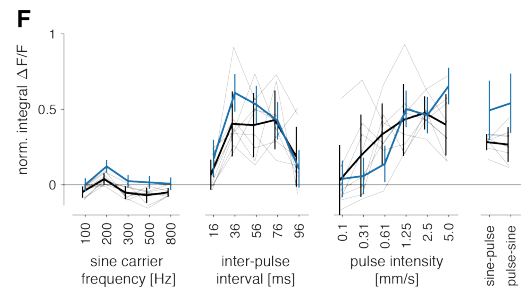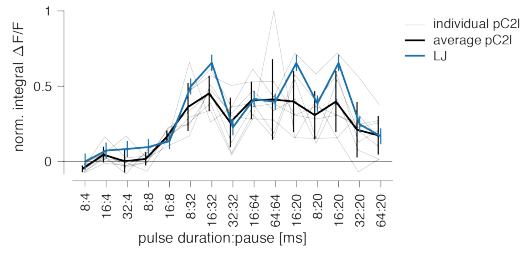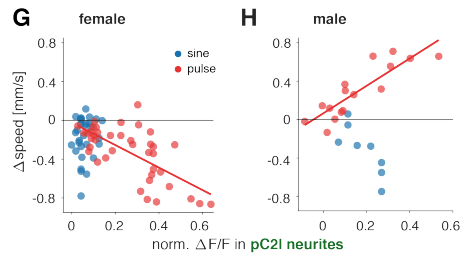

**Figure S4. Calcium responses to song features in pC2 somata and neurites. Related to Figure 4.**

**A** Locations of pC2 somata in the female brain with (pink) or without (grey) auditory responses along the lateral-medial and anterior-posterior (left) or dorsal-ventral (right) axis. Soma positions were normalized to range between 0 and 1 for each animal. Individual symbols correspond to somas from different animals. Responsive pC2 somata are concentrated in the lateral proportion of the cell cluster (lower half of each plot) and largely correspond to the pC2l sub-cluster, although we occasionally also observed auditory responses in pC2m somata (see Video S4).

**B, C** Max z-projection of baseline fluorescence values from a two-photon volumetric scan of a male (B) and female (C) brain expressing GCaMP6m in all Dsx+ neurons. Each of the three clusters (pC1 - white, pC2m - blue, pC2l - yellow) connects to the LJ (red) via unique neurites (arrows). pC2l and pC2m are intermingled in females and therefore hard to distinguish by soma location.

**D** A single pCd2 neuron labeled using MCFO (black) registered to a template brain (JFRC2, gray). The lateral junction (LJ) is marked in magenta. pCd1 (not shown, Kimura et al. (2015)) and pCd2 do not project to the LJ.

**E** Max z-projection of a confocal stack in which aDN (green) and pC2l (red) were labelled with different colors using MCFO. pC2l but not aDN projects to the LJ (blue).

**F** Tuning of individual pC2 somata (grey), the pC2 population (black), and the LJ (blue) for different song features. Lines and error bars indicate mean $\pm$ std over 8 different somata recorded from 8 flies.

**G, H** Comparison of calcium responses in the pC2l neurites of Dsx/GCaMP flies and the speed responses of NM91 flies (males - G, females - H). Correlations are similar when comparing behavioral and neuronal tuning within the same genotype (Dsx/GCaMP, see Figures 4I-J) (female (G): pulse:  $r=-0.68$ ,  $p=1 \times 10^{-6}$ , sine:  $r=0.15$ ,  $p=0.44$ ; male (H): pulse:  $r=0.87$ ,  $p=1.5 \times 10^{-5}$ , sine:  $r=-0.82$ ,  $p=0.01$ ). Each point corresponds to the average response for an individual pulse or sine stimulus ( $\Delta$ speed:  $N \sim 120$  flies per stimulus,  $\Delta F/F$ :  $n=10-24$  female and 1-6 male flies/stimulus).

All  $\Delta F/F$  values from flies expressing GCaMP6m in all Dsx+ cells. All correlation values are Spearman's rank correlation.



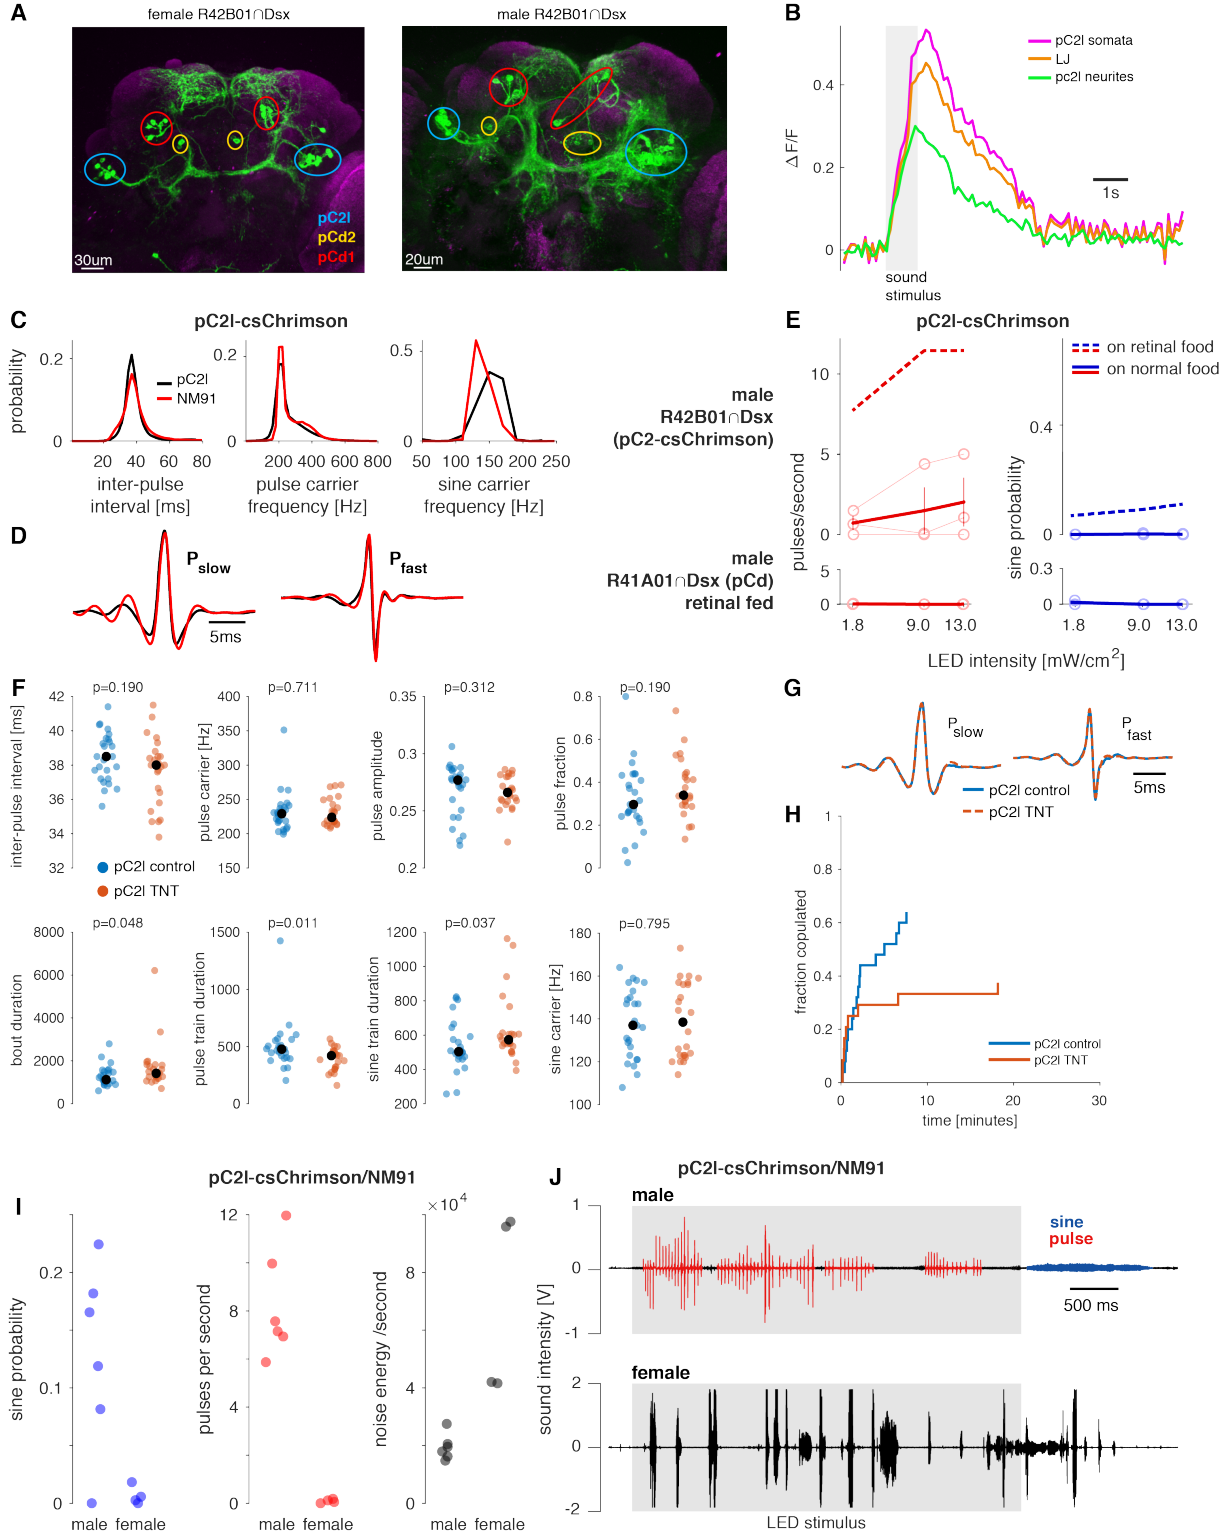

**Figure S5. Activation and silencing of pC2l affects song behavior. Related to Figure 5.**

**A** Expression pattern of CsChrimson.mVenus in the intersection of R42B01 and Dsx (green) for females (left) and males (right). Neuropil is labelled with nc82 (magenta). The locations of the somata or pC2l, pCd1 and pCd2 are marked in blue, yellow and red, respectively. The intersection labels 11/22 female and 22/36 male pC2l neurons, as well as 5-6 pCd1 and 2 pCd2 in either sex

**B** Calcium responses from a female of this line for pulse trains (IPI 36ms) in pC2l somata (blue), the pC2l neurites (yellow) and the LJ (red). We detected auditory response in all 5 pC2l cells visible in the imaging plane, as well as in the LJ and in the pC2l neurites.

**C, D** Song evoked by optogenetic activation of R42B01 $\cap$ Dsx neurons (black, n=7 flies) resembles the natural song produced by wild type flies (NM91, red, n=47 flies) during courtship. Shown are distributions of IPIs, pulse carrier frequencies, and sine carrier frequencies (C) as well as average pulse shapes (D).

**E** Pulse rates and sine song probability upon optogenetic activation of males expressing CsChrimson (red-shifted channel rhodopsin) in R42B01 $\cap$ Dsx (see A) on food without added retinal (top, solid lines, n=3 flies) or on food with retinal (top, dashed lines, n=7 flies), and males expressing CsChrimson in R41A01 $\cap$ Dsx (labels pCd1) fed retinal food (bottom, n=2 flies). Optogenetic activation of pCd1 in the male (bottom) does not evoke song, demonstrating that the singing evoked by R42B01 $\cap$ Dsx activation in males is due to pC2 and not the pCd1 also labeled in this line (see A). Males expressing CsChrimson in R42B01 $\cap$ Dsx that were kept on normal food produced some song upon activation, though much less than males fed retinal (compare solid and dashed lines). This residual activation likely stems from small amounts of retinal in normal food.

**F** Song features for males in which synaptic output of pC2 (and pCd) was suppressed by expressing TNT in R42B01 $\cap$ Dsx (pC2/csChrimson) vs. control males. Males courted wild type NM91 females. P-values come from a two-sided rank sum test. There are no statistically significant differences between experimental and control males in any of the shown song features after correcting for multiple comparisons using the Bonferroni method. The features that differ significantly are shown in Figure 5F. n=25 and 24 males for pC2l control and pC2l TNT, respectively.

**G** Average waveforms of the two pulse types produced by *Drosophila melanogaster* males. Same genotypes as in F. Suppressing the synaptic output of pC2l does not affect pulse shapes.

**H** Copulation rates for the males in F. There is a weak but statistically not significant effect of male genotype on copulation rates (p=0.12, Cox's proportional hazards regression model).

**I** Amount of sine song (left), pulse song (middle), and overall noise (right) produced by males and females upon activation of R42B01 $\cap$ Dsx in the pC2/csChrimson/NM91 background. Noise energy was calculated as the integral root-mean-square voltage. All values correspond to the signals produced in the 6 seconds following the onset of the 4 seconds of activation.

**J** Examples traces of the signals evoked by activating R42B01 $\cap$ Dsx in the pC2/csChrimson/NM91 background. Males (top) mainly produce pulse song (red) during the activation and sine song (blue) after activation. Females (bottom) only produce noisy signals that do not resemble any of the known modes of courtship song. The duration of the LED activation is marked as a gray rectangle.

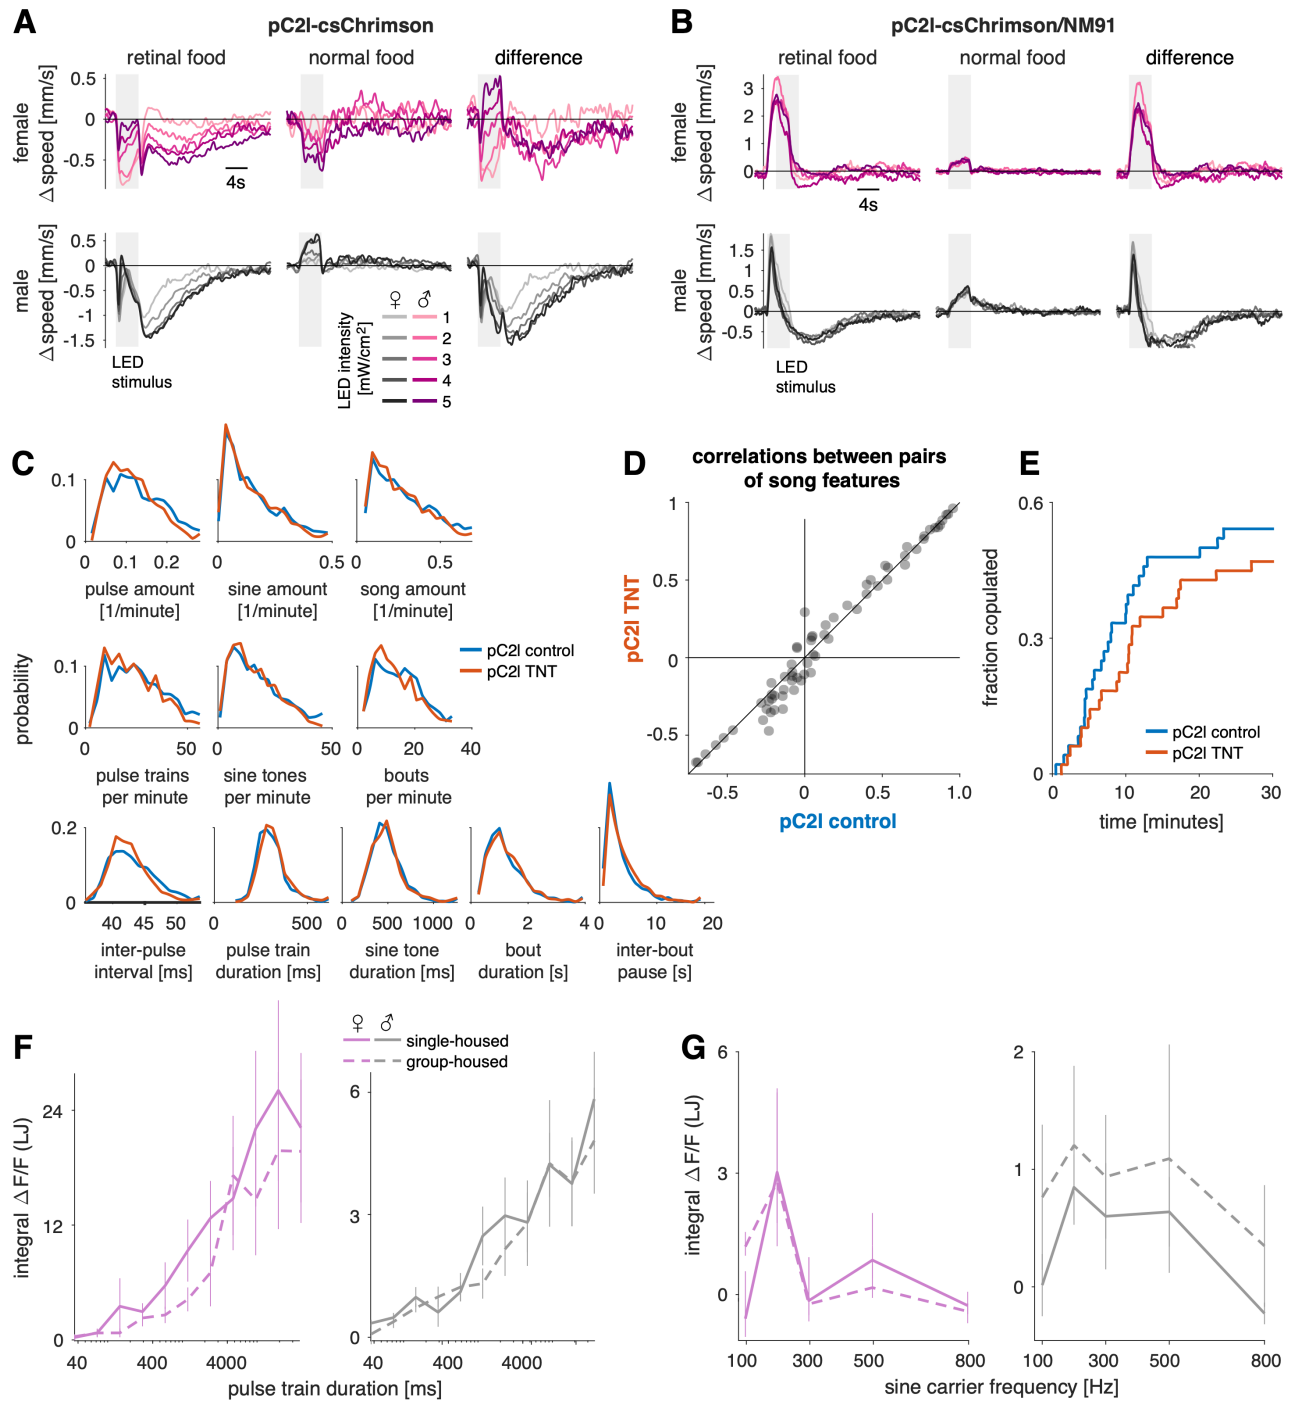

**Figure S6. Activation and silencing of pC2I affects locomotor behavior, and the effect of housing on LJ calcium responses. Related to Figures 5 and 6.**

**A, B** Speed traces for female (magenta, top) and male (grey, bottom) flies expressing CsChrimson in R42B01nDsx using two different genotypes: pC2/csChrimson (A) and pC2/csChrimson/NM91 (B) (see Methods). Shown are responses for flies fed retinal (left), normal food (middle) and the difference between the traces of retinal and normally fed flies (right). Colors correspond to different intensities of 655nm light (see legend in A). Lines in A correspond to averages over 70 females and 83 males fed retinal food, and 29 female and 34 males fed normal food. Lines in B correspond to averages over 67 females and 53 males fed retinal food, and 68 female and 84 males fed normal food.

**C** Statistics of male song do not change when they court pC2I TNT females (using the R42B01nDsx driver). Shown are distributions of 11 song parameters from NM91 males courting pC2 control (blue) or pC2 TNT females (orange).

**D** Female genotype does not change correlation statistics (correlations between pairs of song parameters) in the song of NM91 males. Shown are all unique pair-wise correlations between the 11 song parameters in C for the song of NM91 males courting pC2I control (x values) or pC2I TNT females (y values).

**E** Cumulative fraction of copulated pairs of NM91 males courting pC2I control (blue) or pC2I TNT females (orange). There is a weak but statistically not significant effect of female genotype on copulation rates ( $p=0.19$ , Cox's proportional hazards regression model).

**F** Calcium responses in pC2 neurons (measured via the LJ) for pulse trains with different durations (IPI=36ms) in single- and group-housed (solid and dashed lines) females (left) and males (right). Data from 5-6 flies for each condition (single/group-housed, females/males).

**G** Same as F, but for sine carrier frequency. Data from 20/5 single/group-housed females and 12/6 single/group-housed males. Responses to pulse trains with different durations and to sine tones with different carrier frequencies do not change substantially with housing conditions.

Lines and error bars correspond to mean  $\pm$  SEM over flies. Behavioral data in C-E from 48 pC2 control and 48 pC2 TNT pairs.  $\Delta F/F$  values in F-G from flies expressing GCaMP6m in all Dsx+ cells.
